# Supplementary material for: Wasted Biomaterials from Crustaceans as a Compliant Natural Product Regarding Microbiological, Antibacterial Properties and Heavy Metal Content for Reuse in Blue Bioeconomy: A Preliminary Study
Source: MDPI journal article supplement (doi:10.3390/ma14164558), 2021-08-13
Supplement: s1 [file s1]

Blue coloured shell, 2 g loading

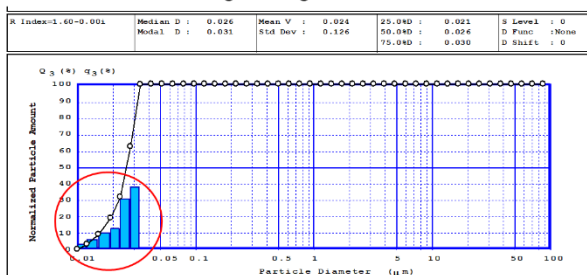

Blue coloured shell, 12.5 g loading

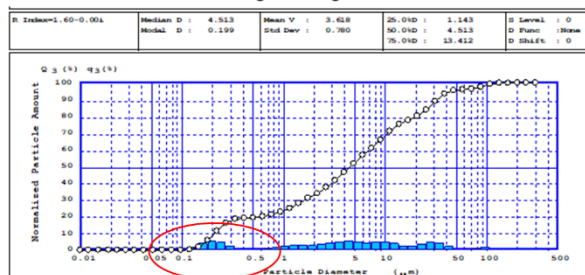

White crab carapace, 12 g loading

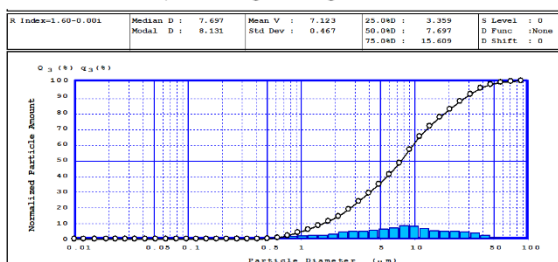

Blue crab carapace, 12 g loading

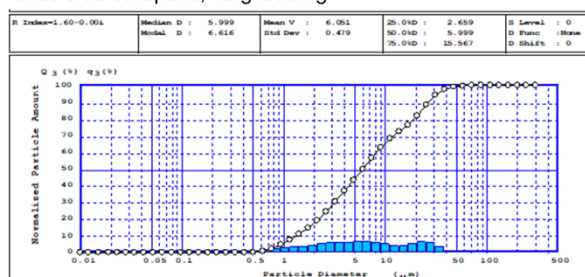

Green crab shell, 2 g loading

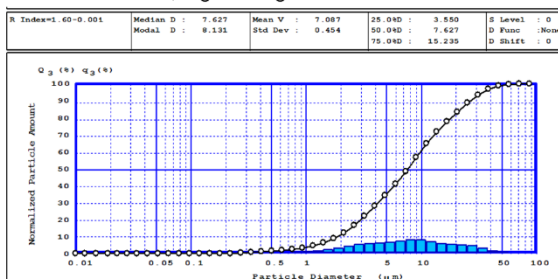

Red shell, 2 g loading

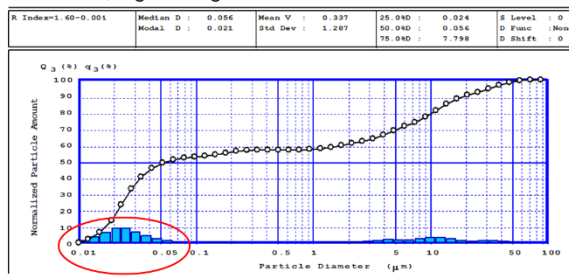

**Figure S1.** Results of DLS particle size distribution measurements of selected shell parts. The nano-sized fraction of the blue and red shells are indicated by red ovals.

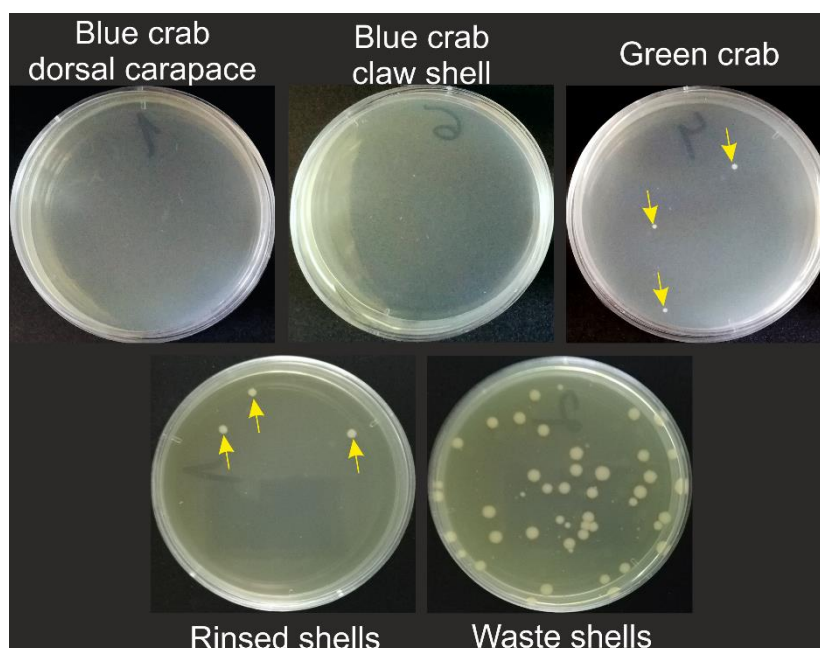

**Figure S2.** Plates with *Enterococcus* spp (small colonies) and *E. coli* (large colonies). Cultures in the presence of powdered crab shells as indicated. Yellow arrows point the CFU (colony forming units).
